# Supplementary material for: Microsatellite Repeat Instability Fuels Evolution of Embryonic Enhancers in Hawaiian Drosophila
Source: PubMed Central journal article supplement (PMC4076327; doi:10.1371/journal.pone.0101177), 2014-06-30
Supplement: pone.0101177.s001.pdf [file pone.0101177.s001.pdf]

**Supporting Information:**

**Table S1. Location of CAR repeat-rich sequences in conserved Su(H) blocks.**

| <b>lcl</b> | <b>Location of lcl_# sequences with CAR-MSR in genome annotations</b> | <b>Repeat length (# of CARs)</b> | <b>(CAR)<sub>n</sub> Repeat Location</b> |
|------------|-----------------------------------------------------------------------|----------------------------------|------------------------------------------|
| 1025       | Intergenic, intronic to <i>D. mela. Snoo</i>                          | 8 and 10                         | Intronic                                 |
| 1726       | Intergenic                                                            | 5 and 6                          | UTR                                      |
| 2862       | Intronic to hypothetical gene                                         | 7                                | Intronic                                 |
| 4636       | BOTH intronic/exonic, in <i>D. mela. wb</i>                           | 6                                | Intronic                                 |
| 6209       | Intronic, in <i>D. mela. mam</i>                                      | 6                                | Intronic                                 |
| 9220       | BOTH intronic/exonic, in <i>pnt</i>                                   | 6                                | Exon                                     |
| 9335       | BOTH intronic/exonic                                                  | 6                                | Intronic                                 |
| 1759       | Intergenic, near <i>Klu</i>                                           | 5                                | UTR                                      |
| 10728      | Intronic, in <i>Ptx1</i>                                              | 4                                | Intronic                                 |
| 4177       | Intergenic, intronic to <i>D.mela. Shroom</i>                         | 4                                | Intronic                                 |
| 8168       | Both intronic/exonic, in <i>vnd</i>                                   | 4                                | Intronic                                 |
| 8914       | Intronic                                                              | 4                                | Intronic                                 |

Sequences with > 4 CAR repeats  
In: "35\_dgrim\_e-30\_99\_SuHZld.txt"
