# Supplementary material for: Microsatellite Repeat Instability Fuels Evolution of Embryonic Enhancers in Hawaiian Drosophila
Source: PubMed Central journal article supplement (PMC4076327; doi:10.1371/journal.pone.0101177), 2014-06-30
Supplement: pone.0101177.s004.pdf [file pone.0101177.s004.pdf]

# Microsatellite repeat instability fuels evolution of embryonic enhancers in Hawaiian *Drosophila*

Andrew Brittain, Elizabeth Stroebele, and Albert Erives

```
TTGTAATGTGAGAAATTTAAATTAGGTAGCCGCAAAATGCGGCTCAGATGGTTGAACAATGACTACGAAATCTCAAG  
CGGAAGATGCCCGAAGAATACAACAACACA CA AAAATTATGAAAAAGAGTAAAAATGTTT CAACAACAATATATGT  
GTTGTTGTTGTTGTTGTTGTT
```

--

```
>lcl_6209 SuH_block_type_SFf intron
```

```
TAAAGTATTACAGAACCACGGGGACCGCTGAGGTCGCCCACGCGCCATTTGTGGCGAACGTGAACTTTGCGCGCCAA  
CTGTATCTAGAAAATAGTATATATGTGTGATATATATTTGTACATAGATATACACACACACACATACATCTTTCCAT  
ATCAGTTTTCTCAGCTCA CAATATGGTTTTTTT CAACAGGTAAAATGC CAGCCAAGATT TTGCCGTTTTTTGGGCGCC  
AGAAGGTTTTCTGTTGCTGCGATTTTTCGCTTACATGACAAGCGCCCGTTTGGCCCTTTTCATTTGTTGTTGTTT  
CTGTTGTTGCTGTTGTTGTT
```

--

```
>lcl_8168 SuH_block_type_SFf intron and exon (vnd) (longest repeat in exon)
```

```
GACAGCTGACCACTACCTGGTTGGGATGCTCGTCTTCGTTTGGCC CAGGCTAGCACTAGCAGTAAACGTTAAGCATT  
TTTTAGCCACATGTTGGCGCAAGTAAAAAGCGTTC TTGCTTCCGTTTTTCCATGCTGAATTTTCCCAATGTGCGC  
GCGAAATTTCCACGCGCTCAGGTCCACATCAGGACGCGGGGCAATCCCCGCATATCTGAGCGGAATTCCTTTGCAC  
TCGTCCAACTTCGGCGCAGACAGTGTGTGCGCGTTTTCGCTC TTGTGTTGTTGCTGTTGTTGTTGTTGTTGTTGTT  
TCTCGTGTCTGCTGCACACA
```

--

```
>lcl_8914 SuH_block_type_SFf intron
```

```
TATTGCTGTTGTTGTGATGGGTGTGTCTGTGTATGTATGTGTGTATTTGTGTGTGTGTGTGTGTGTGCTTGTGTG  
TGAGAGAAATATGAGTCTACTCAATGGAGGTCGTTGCTATTCTCCCTGCTTAGCATAAGGCAATTTCCATTGTTCTT  
GTATCATGTGAGAAAACGTGTGCATTCTTAAGGTACCTTCAAATTTTGTAAATTATAAACATTAAGTGAGTCTGTGT  
ATGTGTGTGAGTGTGTGTGTGTGCAATGGGGCCTATTAGAAGTAGGTAACCATGAGTAAGATTACTTCTATGAAAAC  
ATACAATTTGTGTCATTAGG
```

--

```
>lcl_9220 SuH_block_type_SSSFf intron and exon (pnt) (one repeat in exon)
```

```
CGCAAAAGAAGTTGAGTAAAAAATTAATGAAATGAAATCAGTGCTTAAAGATTGAGGGGAGACAAGAGCCCCAGCA  
GCAGCAGCAGCAGCTTGAGAATTTAGCCCAAAAATACCAAAAAAAAAAAGGCACACA AAAAAGGGAAACCAAGAAATA  
TTCGTATTTCCACGACTCATGGAGCCAGACGC CAACGCGACGAGTCC TTGATCGAGGCA TTGAAATGTACGAGTACC  
TCGGTAAGTGATAGTTGCTCTCAGATTAAATCGTCTGCATTTCGCAATGATTTCGCACA TTGGCCAGCAAGTCGAGCAT  
ACCGCAAACCGGCATGCAGGGTATTACCTCTTCGACAAATTCAGTCTCTTAAAGAGCCCTTTTCTTTT TGGGG  
GGATTAGCAGGTAAGCCGAAAGGCAGCCTCA TTGTGTACCGCTCACAGGATCCG CAGAGACGACGAGTGTGTCTT  
TGTAAATTCGAGTCGAACATTCATTTTTTCGGTTTTTATTTTCATCTTTGCCTAAAA CA AATATGAGCATATATATT  
AAAAACAAGATGTATGAAAATGCTCGCCAAAAGAATTTCAAGTTCAAGTGCCTGGGAATTTTGTAGTTCTGCGAAT  
TTTTATGGTCTGTAGAATATCATAATGGGGATTGATGGTCAATTGTACGTCTATTAATGTATAAATATAAATTTGAAT  
TTAAATTTCTTGATACCTTCA CAACATTTTCTTA TTGAATTAATATAAAAAATAAATCCCTTGAGCATAATTAATTA  
GTAATGTGTATATAAAGGA CAATATCACACGGCTCAGGTGCAGCATTTTTTCGTTTTCTCTGTGGCTGCTACCCTCA  
TCAAAATGGCAATTAATTATATCATTTTTTTTGAATGATTGCTTTCTACTCCAAATATTCGAAACGTTTCGTA TTGGGC  
TCGATCGTTTTCACCCCTGT TTGCGGGGCACGCACGGGCGATCCTCTCTGAATCTTGCAGCATGCAACATGTGAGAA  
ACAAACACA CAATCGCGCACACACACATATATGCACACTCACACACACACACACA CAGGTTTCGCAAGACGGG  
CATAACA AATTTAAGTGTTGAGTGTGTAATTTTATATTTCCGGTGTAGTAAGTTTCATACGACA AACTCAGCTCTTTG  
CCTGGG
```

--

```
>lcl_9335 SuH_block_type_SFf intron and exon (CG1499_RA or CG1499-RB) (repeat NOT in exon)
```

```
ATTTATGCGCCTGGGTC TTGTGGCCACCATGAACTAGA AACTCAGTAA TTGAATGAATGAGCCGACCAGGTA AAAATTA  
TTGAATTTTCTTTGGCACA CA AAA CAGGCAGCTGCATAAAACGA CAGCAGCATCAGCAGCATCAGCAGCAGCAACTG  
TTGAAATTTCTCACACTTTCTAACTCACCTGGCAATTTATCGGCGGTCTGTTGAAACAGCACACAAGCCGGTTTCA  
TAGTTGACAGAGCTACAGGATTCGTTGCTCTGACAGGCCTCAAGCAGTCCGTAAGCATCAGAGTACCCGGCAATGT  
ATC CAACATTTTGTGAGGGCG
```
